# Supplementary material for: Interactions of fertilisation and crop productivity in soil nitrogen cycle microbiome and gas emissions
Source: Copernicus journal article supplement (doi:10.5194/soil-11-1-2025), 2025-01-03
Supplement: Supplementary file 1 [file soil-11-1-2025-supplement.pdf]

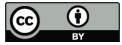

*Supplement of*

## **Interactions of fertilisation and crop productivity in soil nitrogen cycle microbiome and gas emissions**

**Laura Kuusemets et al.**

*Correspondence to:* Laura Kuusemets ([laura.kuusemets@ut.ee](mailto:laura.kuusemets@ut.ee))

The copyright of individual parts of the supplement might differ from the article licence.

## Supplementary Materials

**Table S1:** The average C, N, P and K content (percentage (%) of the total dry matter) in manure added in 2022 and during the last ten years.

| Chemical properties of manure | <b>C (%)</b> | <b>N (%)</b> | <b>P (%)</b> | <b>K (%)</b> |
|-------------------------------|--------------|--------------|--------------|--------------|
| Year 2022                     | 31           | 2.21         | 0.39         | 1.24         |
| Ten-year average              | 37           | 2.51         | 0.62         | 2.80         |

5

10

15

20

25

**Table S2:** Field activities and their timings in the field.

| Field operation       | Date                   | Barley                                                                                                                                           | Sorghum                                                                                                                                                              | Wheat                                                                                                                                            |
|-----------------------|------------------------|--------------------------------------------------------------------------------------------------------------------------------------------------|----------------------------------------------------------------------------------------------------------------------------------------------------------------------|--------------------------------------------------------------------------------------------------------------------------------------------------|
| Sowing date           |                        | May 6 <sup>th</sup>                                                                                                                              | May 18 <sup>th</sup>                                                                                                                                                 | May 6 <sup>th</sup>                                                                                                                              |
| Organic fertilisation | April 28 <sup>th</sup> |                                                                                                                                                  | <i>N0 – 40 t/ha of (231.2 kg N ha<sup>-1</sup>)</i><br><i>N80 – 40 t/ha of (231.2 kg N ha<sup>-1</sup>)</i><br><i>N160 – 40 t/ha of (231.2 kg N ha<sup>-1</sup>)</i> |                                                                                                                                                  |
| Mineral fertilisation | May 5 <sup>th</sup>    | N80 – 80 kg N ha <sup>-1</sup><br>N160 – 120 kg N ha <sup>-1</sup> N                                                                             |                                                                                                                                                                      | N80 – 80 kg N ha <sup>-1</sup><br>N160 – 120 kg N ha <sup>-1</sup> N                                                                             |
|                       | May 6 <sup>th</sup>    |                                                                                                                                                  | N80 – 80 kg N ha <sup>-1</sup><br>N160 – 160 kg N ha <sup>-1</sup>                                                                                                   |                                                                                                                                                  |
|                       | June 10 <sup>th</sup>  | N160 – 40 kg N ha <sup>-1</sup>                                                                                                                  |                                                                                                                                                                      | N160 – 40 kg N ha <sup>-1</sup>                                                                                                                  |
| Herbicide application | June 7 <sup>th</sup>   | Sekator OD: 0.1 L ha <sup>-1</sup>                                                                                                               |                                                                                                                                                                      | Sekator OD: 0.1 L ha <sup>-1</sup>                                                                                                               |
|                       | June 17 <sup>th</sup>  | Tomahawk 200 EC: 0.35 L ha <sup>-1</sup><br>MCPA: 1.5 L ha <sup>-1</sup><br>Orius 250 EW: 1 L ha <sup>-1</sup><br>Cerone: 0.5 L ha <sup>-1</sup> | Tomahawk 200 EC: 0.35 L ha <sup>-1</sup><br>MCPA: 1.5 L ha <sup>-1</sup>                                                                                             | Tomahawk 200 EC: 0.35 L ha <sup>-1</sup><br>MCPA: 1.5 L ha <sup>-1</sup><br>Orius 250 EW: 1 L ha <sup>-1</sup><br>Cerone: 0.5 L ha <sup>-1</sup> |
| Harvest date          |                        | August 16 <sup>th</sup>                                                                                                                          | September 27 <sup>th</sup>                                                                                                                                           | August 18 <sup>th</sup>                                                                                                                          |

30 **Table S3:** Primers used in qPCR, their concentrations and qPCR programs.

| Marker gene           | Primer        | Primer concentration ( $\mu\text{M}$ ) | Reference                       | qPCR program                                                                    |
|-----------------------|---------------|----------------------------------------|---------------------------------|---------------------------------------------------------------------------------|
| bacterial 16S rRNA    | Bact517F      | 0,6                                    | Liu <i>et al.</i> , 2007        | 95°C 10 min; 35 cycles: 95°C 30 s, 60°C 45 s; 72°C 45 s                         |
|                       | Bact1028R     |                                        | Dethlefsen <i>et al.</i> , 2008 |                                                                                 |
| archaeal 16S rRNA     | Arc519F       | 0,6                                    | Espenberg <i>et al.</i> , 2016  | 95°C 10 min; 45 cycles: 95°C 15 s, 56°C 30 s; 72°C 30 s                         |
|                       | Arch910R      |                                        |                                 |                                                                                 |
| <i>nirK</i>           | nirK876       | 0,8                                    | Hallin ja Lindgren, 1999        | 95°C 10 min; 45 cycles: 95°C 15 s, 58°C 30 s; 72°C 30s, 80°C 30 s <sup>a</sup>  |
|                       | nirK1040      |                                        |                                 |                                                                                 |
| <i>nirS</i>           | nirSCd3af     | 0,8                                    | Kandeler <i>et al.</i> , 2006   | 95°C 10 min; 45 cycles: 95°C 15 s, 55°C 30 s; 72°C 30s, 80°C 30 s <sup>a</sup>  |
|                       | nirSR3cd      |                                        |                                 |                                                                                 |
| <i>nosZI</i>          | nosZ2F        | 0,8                                    | Henry <i>et al.</i> , 2006      | 95°C 10 min; 45 cycles: 95°C 15 s, 60°C 30 s, 72°C 30 s, 80°C 30 s <sup>a</sup> |
|                       | nosZ2R        |                                        |                                 |                                                                                 |
| <i>nosZII</i>         | nosZIIF       | 1.2                                    | Jones <i>et al.</i> , 2013      | 95°C 10 min; 45 cycles: 95°C 30 s, 54°C 45 s, 72°C 45 s, 80°C 45 s <sup>a</sup> |
|                       | nosZIIR       |                                        |                                 |                                                                                 |
| bacterial <i>amoA</i> | amoA-1F       | 0,8                                    | Rotthauwe <i>et al.</i> , 1997  | 95°C 10 min; 45 cycles: 95°C 30 s, 57°C 45 s, 72°C 45 s                         |
|                       | amoA-2R       |                                        |                                 |                                                                                 |
| archaeal <i>amoA</i>  | CrenamoA 23F  | 0.8                                    | Tourna <i>et al.</i> , 2008     | 95°C 10 min; 45 cycles: 95°C 30 s, 55°C 45 s, 72°C 45 s                         |
|                       | CrenamoA 616R |                                        |                                 |                                                                                 |
| comammox <i>amoA</i>  | comamoA AF    | 1.2                                    | Wang <i>et al.</i> , 2018       | 95 °C 10 min; 40 cycles: 95 °C 15 s, 55 °C 30 s, 72 °C 30 s                     |
|                       | comamoA SR    |                                        |                                 |                                                                                 |
| <i>nrfA</i>           | nrfAF2awMOD   | 1.2                                    | Cannon <i>et al.</i> , 2019     | 95 °C 10 min; 45 cycles: 95 °C 15 s, 56 °C 30 s, 72 °C 30 s                     |
|                       | nrfAR1MOD     |                                        |                                 |                                                                                 |

**Table S4:** Spearman correlation coefficients between moisture and gene copies abundance and N<sub>2</sub>O-N emissions. Significance is indicated as \*\*\* – 0.001; \*\* – 0.01; \* – 0.05; ns – not significant.

35

| Gene parameter/N <sub>2</sub> O-N | Moisture |         |         |                     |       |
|-----------------------------------|----------|---------|---------|---------------------|-------|
|                                   | All      | Barley  | Sorghum | Sorghum with manure | Wheat |
| bacterial 16S rRNA                | ns       | ns      | 0.55*** | ns                  | ns    |
| archaeal 16S rRNA                 | ns       | ns      | ns      | ns                  | ns    |
| <i>nirK</i>                       | ns       | ns      | ns      | ns                  | ns    |
| <i>nirS</i>                       | 0.29***  | 0.54*** | ns      | 0.56***             | ns    |
| <i>nosZI</i>                      | ns       | ns      | ns      | ns                  | ns    |
| <i>nosZII</i>                     | ns       | ns      | ns      | ns                  | ns    |
| bacterial <i>amoA</i>             | ns       | ns      | ns      | ns                  | ns    |
| archaeal <i>amoA</i>              | ns       | -0.38*  | ns      | ns                  | ns    |
| comammox <i>amoA</i>              | ns       | ns      | -0.50** | ns                  | ns    |
| <i>nrfA</i>                       | ns       | ns      | 0.44**  | ns                  | ns    |
| N <sub>2</sub> O-N                | ns       | ns      | ns      | ns                  | ns    |

40

45

**Table S5:** Spearman correlation coefficients between soil total carbon, total nitrogen,  $\text{NH}_4^+\text{-N}$ ,  $\text{NO}_3^-\text{-N}$ , total dry weight biomass and N in total dry weight biomass. Significance is indicated as \*\*\* – 0.001; \*\* – 0.01; \* – 0.05; ns – not significant.

|                          | Total carbon | Total nitrogen | $\text{NO}_3^-\text{-N}$ | $\text{NH}_4^+\text{-N}$ | Total biomass | N in total biomass |
|--------------------------|--------------|----------------|--------------------------|--------------------------|---------------|--------------------|
| Total carbon             | 1            | 0.91***        | ns                       | ns                       | 0.49*         | 0.35*              |
| Total nitrogen           | 0.91***      | 1              | 0.50*                    | ns                       | 0.59**        | 0.58***            |
| $\text{NO}_3^-\text{-N}$ | ns           | 0.50*          | 1                        | ns                       | 0.78***       | 0.84***            |
| $\text{NH}_4^+\text{-N}$ | ns           | ns             | ns                       | 1                        | ns            | ns                 |
| Total biomass            | 0.49*        | 0.59**         | 0.78***                  | ns                       | 1             | 0.83***            |
| N in total biomass       | 0.35*        | 0.58**         | 0.84***                  | ns                       | 0.83***       | 1                  |

50

**Table S6:** Partial N budget of the sites ( $\text{kg N ha}^{-1}$ ).

|                                                                                       | Barley      |             |             | Sorghum     |             |             | Sorghum with manure |             |             | Wheat       |             |             |
|---------------------------------------------------------------------------------------|-------------|-------------|-------------|-------------|-------------|-------------|---------------------|-------------|-------------|-------------|-------------|-------------|
|                                                                                       | N0          | N80         | N160        | N0          | N80         | N160        | N0                  | N80         | N160        | N0          | N80         | N160        |
| N added with manure + mineral fertilizer                                              | 0           | 80          | 160         | 0           | 80          | 160         | 231.2               | 311.2       | 391.2       | 0           | 80          | 160         |
| N in plant biomass                                                                    | 18.17       | 46.06       | 90.14       | 11.63       | 21.02       | 51.73       | 44.82               | 60.48       | 106.34      | 26.39       | 93.56       | 128.74      |
| Change of soil N content                                                              | -50.09      | -40.38      | 104.40      | -18.41      | -64.38      | -222.79     | -163.11             | -159.34     | -198.82     | -116.62     | -273.28     | -214.64     |
| N losses (Methodology S4)                                                             | 31.93       | 74.31       | -34.54      | 6.78        | 123.36      | 331.06      | 349.49              | 410.06      | 483.68      | 90.24       | 259.72      | 245.89      |
|                                                                                       |             |             |             |             |             |             |                     |             |             |             |             |             |
| $\text{N}_2\text{O-N}$ emissions                                                      | 0.08 ± 0.02 | 0.16 ± 0.02 | 0.31 ± 0.03 | 0.09 ± 0.04 | 0.09 ± 0.03 | 0.34 ± 0.03 | 0.18 ± 0.04         | 0.34 ± 0.06 | 0.32 ± 0.02 | 0.10 ± 0.01 | 0.22 ± 0.04 | 0.45 ± 0.06 |
| $\text{N}_2\text{-N}$ emissions (estimated based on $\text{N}_2\text{O-N}$ emissions) | 1.59 ± 0.14 | 2.29 ± 0.33 | 7.12 ± 0.78 | 3.38 ± 0.87 | 2.52 ± 0.49 | 6.66 ± 2.11 | 3.93 ± 0.51         | 4.59 ± 0.80 | 4.47 ± 0.50 | 1.81 ± 0.48 | 2.64 ± 0.53 | 7.69 ± 2.58 |

**Table S7:** Spearman correlation coefficients between gene copies abundance and N<sub>2</sub>O-N emissions. Significance is indicated as \*\*\* – 0.001; \*\* – 0.01; \* – 0.05; ns – not significant.

| Gene parameter        | N <sub>2</sub> O |         |         |                     |         |
|-----------------------|------------------|---------|---------|---------------------|---------|
|                       | All              | Barley  | Sorghum | Sorghum with manure | Wheat   |
| bacterial 16S rRNA    | ns               | ns      | ns      | ns                  | ns      |
| archaeal 16S rRNA     | 0.18*            | ns      | ns      | ns                  | ns      |
| <i>nirK</i>           | ns               | ns      | ns      | ns                  | ns      |
| <i>nirS</i>           | 0.19*            | 0.58*** | ns      | ns                  | ns      |
| <i>nosZI</i>          | ns               | ns      | ns      | ns                  | ns      |
| <i>nosZII</i>         | ns               | ns      | ns      | 0.41*               | -0.46** |
| bacterial <i>amoA</i> | ns               | ns      | ns      | ns                  | -0.40*  |
| archaeal <i>amoA</i>  | -0.15*           | ns      | ns      | ns                  | ns      |
| comammox <i>amoA</i>  | ns               | ns      | -0.47** | ns                  | ns      |
| <i>nrfA</i>           | ns               | ns      | ns      | ns                  | ns      |

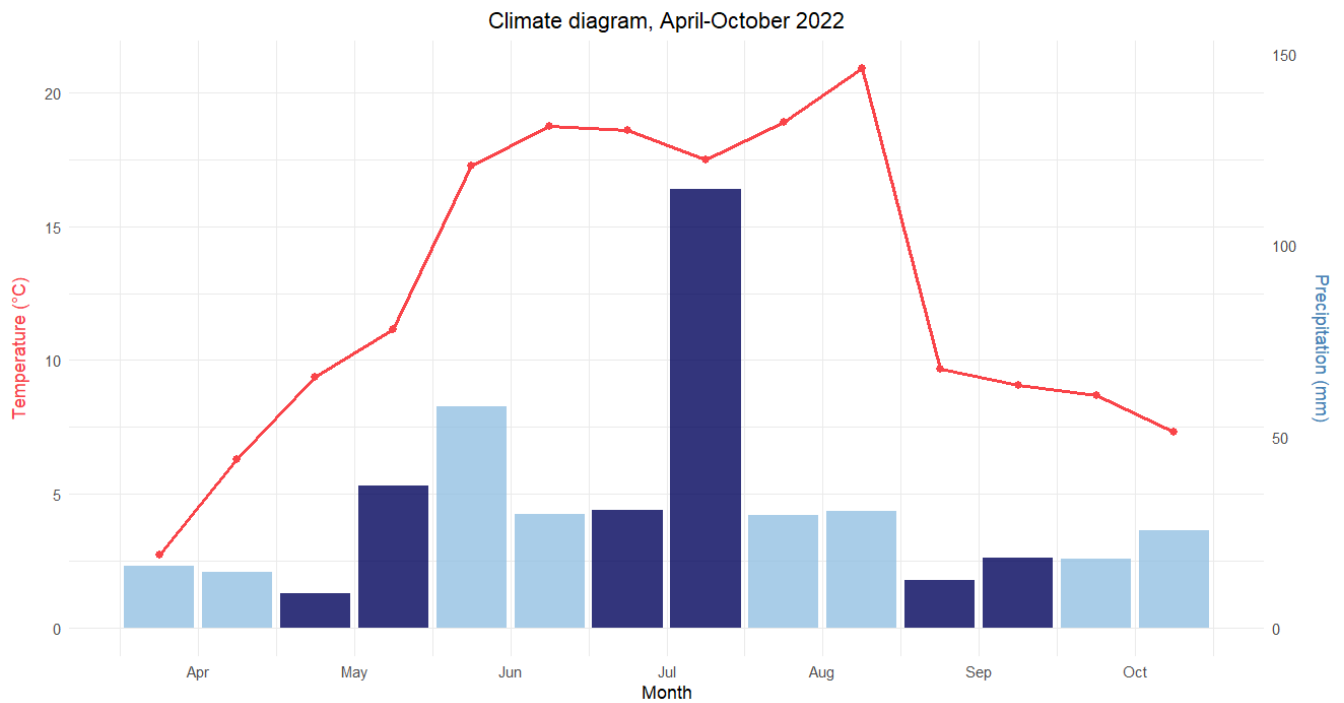

**Fig. S1:** Climate diagram of the study area for the study period (April-October 2022). The blue columns on the x-axis represent precipitation (mm). The red line indicates the average air temperature. Each month is depicted with two bars (light and dark blue colours are used to distinguish months visually) for precipitation: the first bar represents the first half of the month, and the second bar represents the second half of the month.



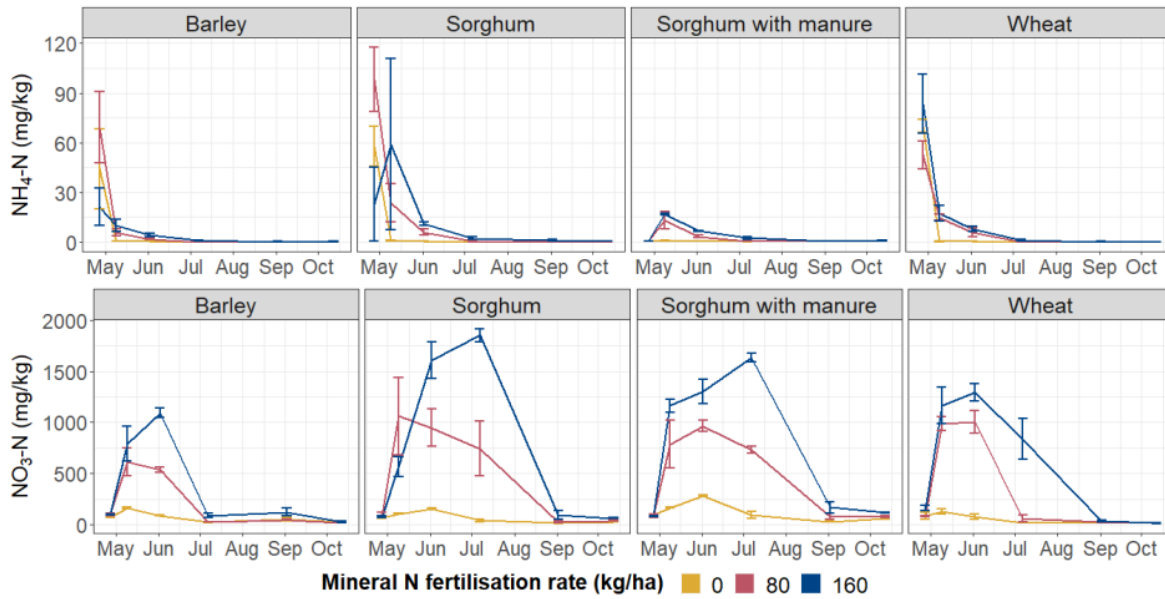

**Fig. S2:** NH<sub>4</sub><sup>+</sup>-N (mg kg<sup>-1</sup>) and NO<sub>3</sub><sup>-</sup>-N (mg kg<sup>-1</sup>) contents of soil according to crops and fertilisation rates during the study period.

65

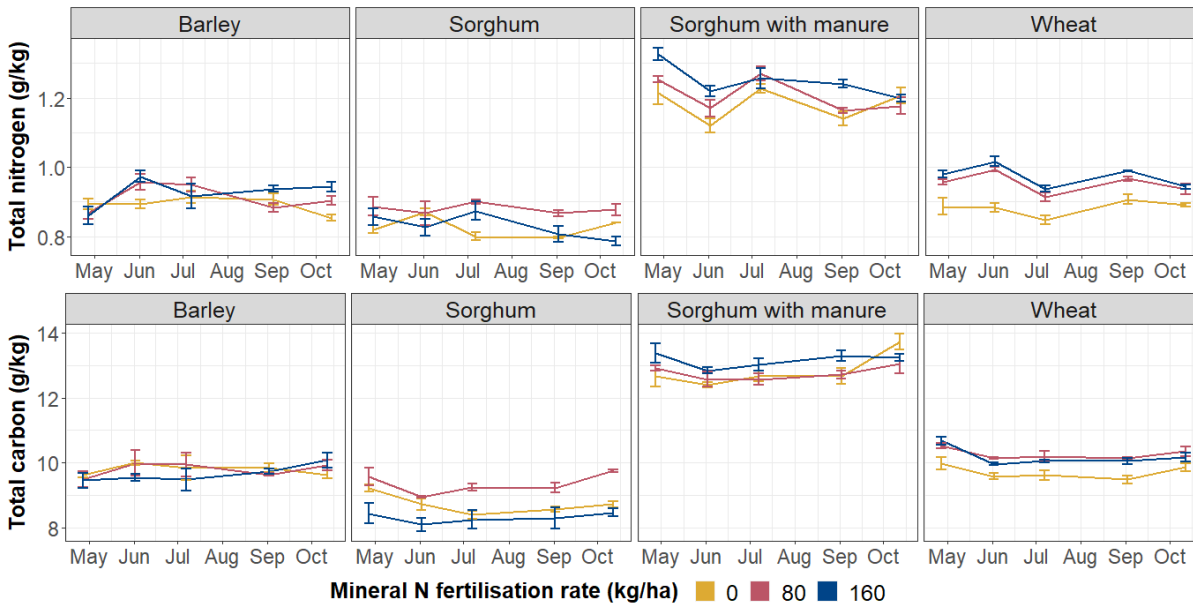

**Fig. S3:** Total nitrogen (g kg<sup>-1</sup>) and total carbon (g kg<sup>-1</sup>) contents of soil according to crops and fertilisation rates during the study period.

70

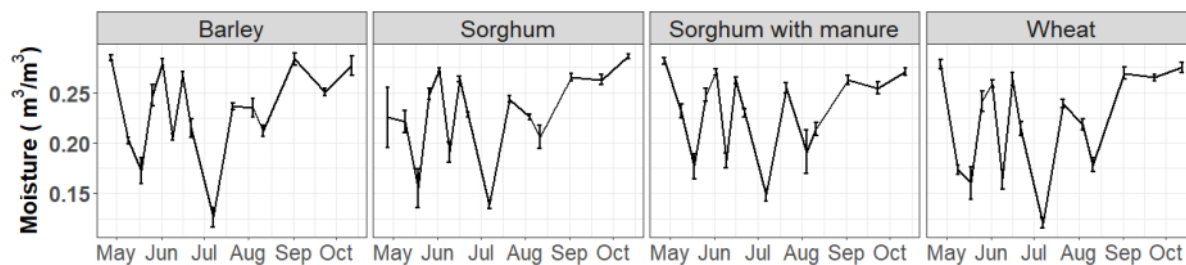

**Fig. S4:** Soil moisture (m<sup>3</sup>/m<sup>3</sup>) over the study period according to crop types and treatment.

75

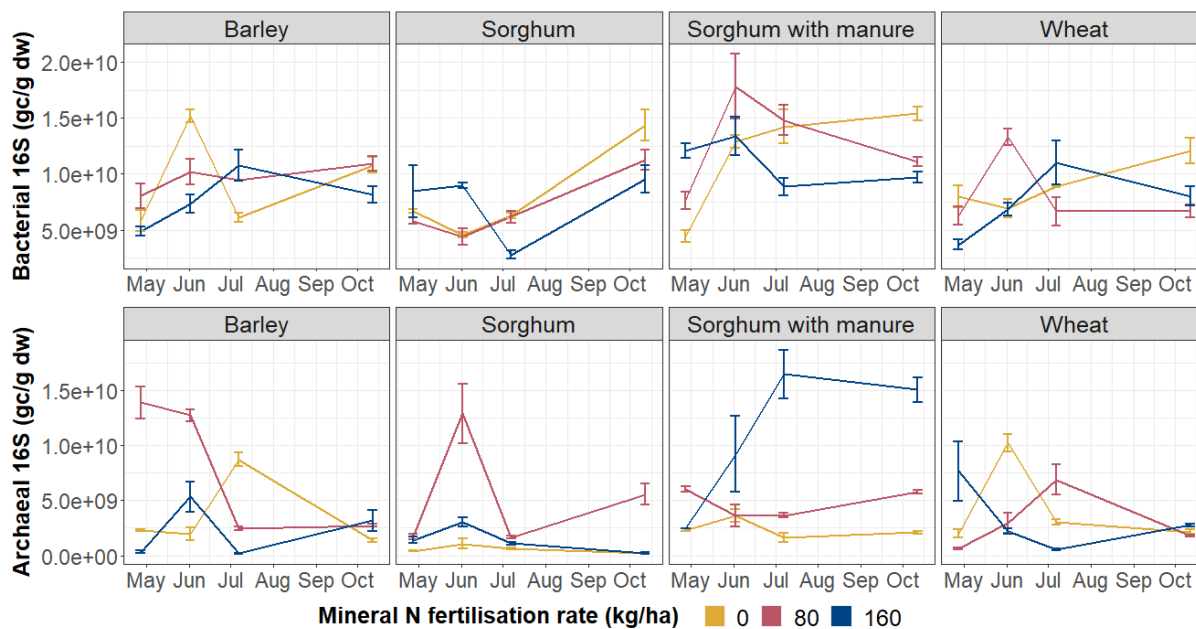

**Fig. S5:** Abundances of bacterial and archaeal 16S rRNA genes according to crops and fertilisation rates during the study period.

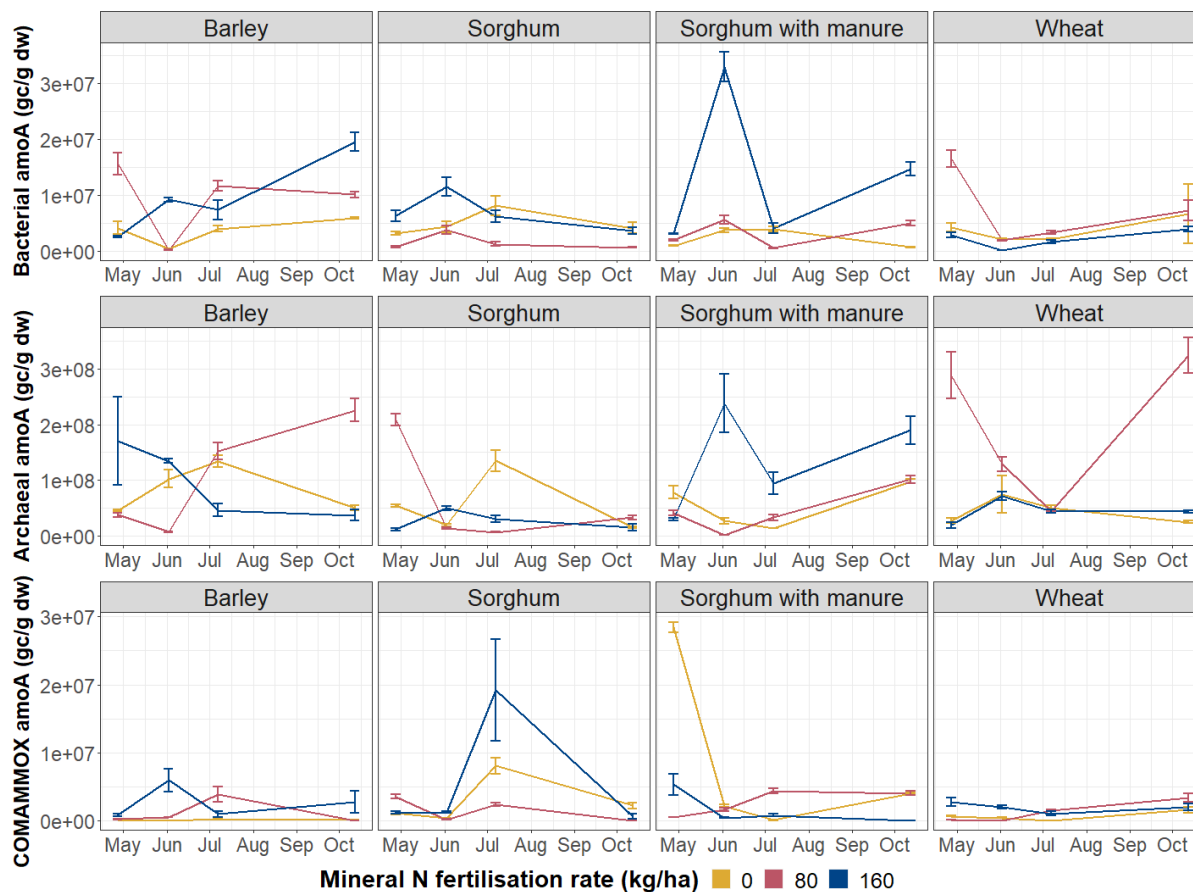

80 **Fig. S6:** Abundances of bacterial, archaeal and comammox *amoA* genes according to crops and fertilisation rates during the study period.

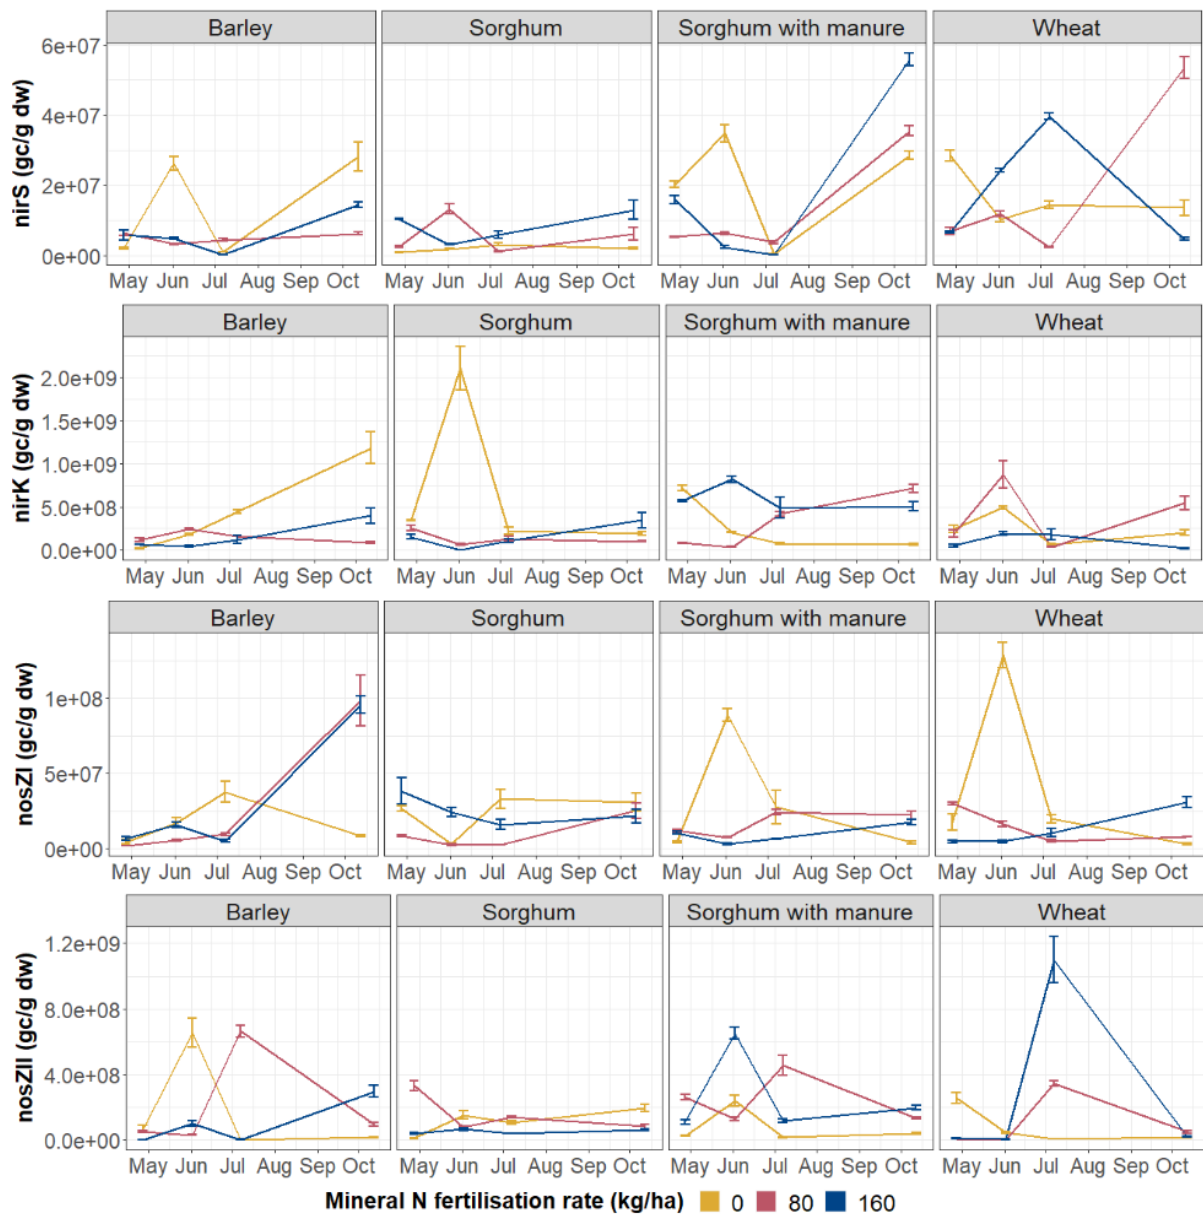

**Fig. S7:** Abundances of *nirK*, *nirS*, *nosZI* and *nosZII* genes according to crops and fertilisation rates during the study period.

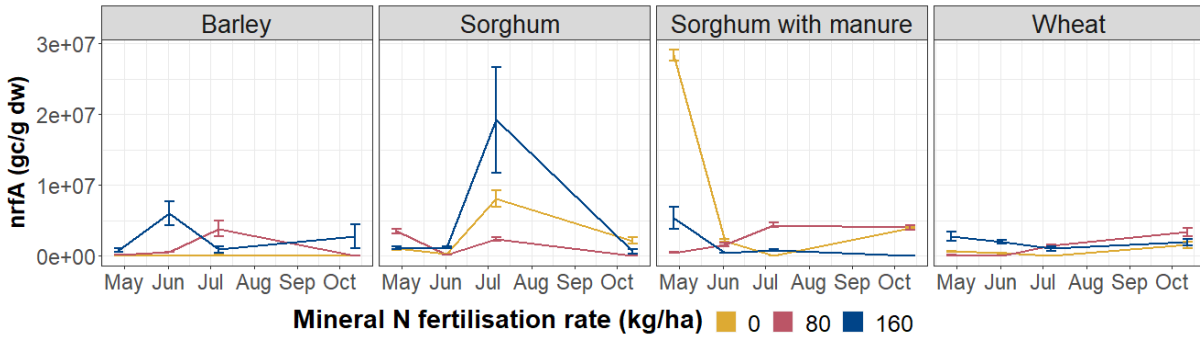

85

**Fig. S8:** Abundance of *nrfA* gene according to crops and fertilisation rates during the study period.

### Supplementary Methodology

#### Methodology S1: Nitrogen use efficiency

90 Nitrogen use efficiency (NUE, kg DM kg<sup>-1</sup> N<sup>-1</sup>) was calculated as the biomass yield produced per unit of N applied (Pandey *et al.*, 2001) as follows:

$$\text{NUE} = \frac{\text{Treatment biomass} - \text{Control biomass}}{\text{Total amount of nitrogen applied}} \quad (\text{S1})$$

Control biomass is the biomass yield of treatment with mineral fertilisation rate 0. For sorghum with manure amendment plots, control biomass is taken from sorghum without manure amendment plot with mineral N fertilisation rate 0.

95

#### Methodology S2: Estimation of the di-nitrogen (N<sub>2</sub>) flux from the Daycent model

The N<sub>2</sub> emissions were estimated from the measured N<sub>2</sub>O emissions using the N<sub>2</sub>:N<sub>2</sub>O ratio, which was calculated as proposed in the DAYCENT model (Parton *et al.*, 2001), with the following equation (Del Grosso *et al.*, 2000):

$$R_{N_2/N_2O} = F_r(NO_3/CO_2) \times F_r(\text{WFPS}) \quad (\text{S2})$$

100 where the factor  $F_r(NO_3/CO_2)$  is a function of electron donor to substrate, calculated as:

$$F_r(NO_3/CO_2) = \max(0.16 k_1, k_1 e^{(-0.8 (C_{NO_3^-}/\text{Flux}_{CO_2}))}) \quad (\text{S3})$$

and  $F_r(\text{WFPS})$  is a factor accounting for the effect of soil water content on the N<sub>2</sub>:N<sub>2</sub>O ratio, with the water-filled pore space (WFPS):

$$F_r(\text{WFPS}) = 1.4/13^{2.2 \text{WFPS}} \quad (\text{S4})$$

### 105 Methodology S3: change of soil N content

Change of soil N content was calculated as a difference between the initial soil total N content and final soil total N content (Sainju, 2017).

Total N content in soil was calculated (Sainju, 2017) as following:

$$STN = STN_c \times BD \times T \times 10\,000 \quad (S5)$$

110  $STN$  = Total N content in soil (kg N ha<sup>-1</sup>),  $STN_c$  = Total N concentration in soil (g N kg<sup>-1</sup>),  $BD$  = bulk density (Mg m<sup>-3</sup>),  $T$ =thickness of the soil layer (m), 10 000 = conversion factor.

### Methodology S4: N losses

N losses are calculated by subtracting N outputs and change of soil N content from N inputs (Sainju *et al.*, 2017; Escuer-  
115 Gatius *et al.*, 2022). We consider N deposition, surface run-off and other fluxes neglectable.

$$N \text{ losses} = F_{\text{min.fertiliser}} + F_{\text{manure}} - \text{harvest} - \Delta N_{\text{soil}} \quad (S6)$$

$F_{\text{min.fertiliser}}$  = amount of N added as mineral fertiliser,  $F_{\text{slurry}}$  = amount of N added as manure,  $\Delta N_{\text{soil}}$  = change of soil N content  
120 during the experiment.

### **References**

- Cannon, J., Sanford, R. A., Connor, L., Yang, W. H., & Chee-Sanford, J.: Optimization of PCR primers to detect phylogenetically diverse *nrfA* genes associated with nitrite ammonification. *Journal of Microbiological Methods*, 160, 49–59. <https://doi.org/10.1016/j.mimet.2019.03.020>, 2019.
- 125 Dethlefsen, L., Huse, S., Sogin, M. L., & Relman, D. A.: The Pervasive Effects of an Antibiotic on the Human Gut Microbiota, as Revealed by Deep 16S rRNA Sequencing. *PLOS Biology*, 6(11), e280. <https://doi.org/10.1371/journal.pbio.0060280>, 2008.
- 130 Escuer-Gatius, J., Löhmus, K., Shanskiy, M., Kauer, K., Vahter, H., Mander, Ü., Astover, A., Soosaar, K. Critical points for closing the carbon and nitrogen budgets in a winter rapeseed field. *Nutrient Cycling in Agroecosystems*, 122, 289–311. <https://doi.org/10.1007/s10705-022-10202-8>, 2022.

- 135 Espenberg, M., Truu, M., Truu, J., Maddison, M., Nõlvak, H., Järveoja, J., & Mander, Ü.: Impact of Reed Canary Grass  
Cultivation and Mineral Fertilisation on the Microbial Abundance and Genetic Potential for Methane Production in Residual  
Peat of an Abandoned Peat Extraction Area. *PLoS One*, 11(9), e0163864. <https://doi.org/10.1371/journal.pone.0163864>,  
2016.
- 140 Hallin, S., & Lindgren, P. E.: PCR detection of genes encoding nitrite reductase in denitrifying bacteria. *Applied and  
Environmental Microbiology*, 65(4), 1652–1657. <https://doi.org/10.1128/AEM.65.4.1652-1657.1999>, 1999.
- Henry, S., Bru, D., Stres, B., Hallet, S., & Philippot, L.: Quantitative detection of the *nosZ* gene, encoding nitrous oxide  
reductase, and comparison of the abundances of 16S rRNA, *narG*, *nirK*, and *nosZ* genes in soils. *Applied and Environmental  
Microbiology*, 72(8), 5181–5189. <https://doi.org/10.1128/AEM.00231-06>, 2006.
- 145 Jones, C. M., Graf, D. R., Bru, D., Philippot, L., & Hallin, S.: The unaccounted yet abundant nitrous oxide-reducing  
microbial community: A potential nitrous oxide sink. *The ISME Journal*, 7(2), 2. <https://doi.org/10.1038/ismej.2012.125>,  
2013.
- 150 Kandeler, E., Deiglmayr, K., Tschirko, D., Bru, D., & Philippot, L.: Abundance of *narG*, *nirS*, *nirK*, and *nosZ* Genes of  
Denitrifying Bacteria during Primary Successions of a Glacier Foreland. *Applied and Environmental Microbiology*, 72(9),  
5957–5962. <https://doi.org/10.1128/AEM.00439-06>, 2006.
- 155 Liu, Z., Lozupone, C., Hamady, M., Bushman, F. D., & Knight, R.: Short pyrosequencing reads suffice for accurate  
microbial community analysis. *Nucleic Acids Research*, 35(18), e120. <https://doi.org/10.1093/nar/gkm541>, 2007.
- Pandey, R. K., Maranville, J. W., & Bako, Y.: Nitrogen Fertilizer Response and Use Efficiency for Three Cereal Crops in  
Niger. *Communications in Soil Science and Plant Analysis*, 32(9–10), 1465–1482. <https://doi.org/10.1081/CSS-100104206>,  
2001.
- 160 Rothauwe, J. H., Witzel, K. P., & Liesack, W.: The ammonia monooxygenase structural gene *amoA* as a functional marker:  
Molecular fine-scale analysis of natural ammonia-oxidizing populations. *Applied and Environmental Microbiology*, 63(12),  
4704–4712. <https://doi.org/10.1128/aem.63.12.4704-4712.1997>, 1997.
- 165 Sainju, U. M.: Determination of nitrogen balance in agroecosystems. *MethodsX*, 4, 199–208.  
<https://doi.org/10.1016/j.mex.2017.06.001>, 2017.

Tourna, M., Freitag, T. E., Nicol, G. W., & Prosser, J. I.: Growth, activity and temperature responses of ammonia-oxidizing archaea and bacteria in soil microcosms. *Environmental Microbiology*, 10(5), 1357–1364. <https://doi.org/10.1111/j.1462-2920.2007.01563.x>, 2008.

Wang, M., Huang, G., Zhao, Z., Dang, C., Liu, W., & Zheng, M.: Newly designed primer pair revealed dominant and diverse comammox amoA gene in full-scale wastewater treatment plants. *Bioresource Technology*, 270, 580–587. <https://doi.org/10.1016/j.biortech.2018.09.089>, 2018.

175
